# Supplementary material for: Outcomes of Baerveldt Glaucoma Drainage Devices in Pediatric Eyes
Source: PubMed Central journal article supplement — J Glaucoma. 2021 Dec 21;31(6):468–77. doi: 10.1097/IJG.0000000000001970 (PMC9148673; doi:10.1097/ijg.0000000000001970), 2021-12-21
Supplement: ijg-31-468-s001.pdf [file ijg-31-468-s001.pdf]

**Supplemental Table 1**

|                  | # Eyes of # Patients   | Gender (F:M) | Age at Surgery (Years) | Follow-up (Years) |
|------------------|------------------------|--------------|------------------------|-------------------|
| <b>Arabic</b>    | 3 Eyes of 2 Patients   | 2:0          | 11.4 ± 8.1             | 4.4 ± 0.7         |
| <b>Asian</b>     | 5 Eyes of 4 Patients   | 1:3          | 3.2 ± 2,4              | 4.1 ± 1.3         |
| <b>Black</b>     | 20 Eyes of 15 Patients | 7:8          | 5.3 ± 5.8              | 5.6 ± 2.2         |
| <b>Caucasian</b> | 73 Eyes of 52 Patients | 30:22        | 9.2 ± 6.1              | 4.4 ± 2.4         |
| <b>Hispanic</b>  | 5 Eyes of 3 Patients   | 1:2          | 6.4 ± 3.7              | 4.3 ± 1.2         |

**Supplemental Table 2**

|                                                | 1st Baerveldt Surgery Per Patient     | All Baerveldt Implantation Surgeries  |  | Anterior Chamber or Sulcus Placement  | Pars Plana Placement                  |
|------------------------------------------------|---------------------------------------|---------------------------------------|--|---------------------------------------|---------------------------------------|
| <b>Success Rate (Years of Final Follow-Up)</b> | 64%<br>(4.8 ± 2.3 years)              | 64%<br>(4.8 ± 2.2 years)              |  | 67%<br>(4.2 ± 2.3 years)              | 58%<br>(4.1 ± 2.6 years)              |
|                                                |                                       |                                       |  |                                       |                                       |
| <b>1-Year Survival (Eyes at Risk)</b>          | 84% with 95% CI [74, 90]<br>(63 Eyes) | 82% with 95% CI [73, 88]<br>(89 Eyes) |  | 81% with 95% CI [70, 88]<br>(63 Eyes) | 87% with 95% CI [70, 95]<br>(23 Eyes) |
| <b>2-Year Survival (Eyes at Risk)</b>          | 77% with 95% CI [65, 85]<br>(49 Eyes) | 76% with 95% CI [67, 83]<br>(69 Eyes) |  | 77% with 95% CI [65, 85]<br>(50 Eyes) | 71% with 95% CI [53, 83]<br>(19 Eyes) |
| <b>3-Year Survival (Eyes at Risk)</b>          | 71% with 95% CI [59, 80]<br>(37 Eyes) | 70% with 95% CI [60, 78]<br>(52 Eyes) |  | 72% with 95% CI [59, 81]<br>(36 Eyes) | 64% with 95% CI [45, 78]<br>(16 Eyes) |
| <b>4-Year Survival (Eyes at Risk)</b>          | 67% with 95% CI [54, 77]<br>(29 Eyes) | 68% with 95% CI [58, 76]<br>(40 Eyes) |  | 72% with 95% CI [59, 81]<br>(26 Eyes) | 57% with 95% CI [38, 72]<br>(13 Eyes) |
| <b>5-Year Survival (Eyes at Risk)</b>          | 60% with 95% CI [46, 72]<br>(20 Eyes) | 61% with 95% CI [49, 70]<br>(29 Eyes) |  | 65% with 95% CI [50, 76]<br>(18 Eyes) | 44% with 95% CI [35, 61]<br>(10 Eyes) |
| <b>6-Year Survival (Eyes at Risk)</b>          | 55% with 95% CI [39, 68]<br>(13 Eyes) | 58% with 95% CI [46, 69]<br>(20 Eyes) |  | 65% with 95% CI [50, 76]<br>(14 Eyes) | 37% with 95% CI [17, 56]<br>(6 Eyes)  |
| <b>7-Year Survival (Eyes at Risk)</b>          | 48% with 95% CI [29, 64]<br>(7 Eyes)  | 49% with 95% CI [33, 63]<br>(9 Eyes)  |  | 50% with 95% CI [27, 70]<br>(6 Eyes)  | 37% with 95% CI [17, 56]<br>(4 Eyes)  |
| <b>8-Year Survival (Eyes at Risk)</b>          | 32% with 95% CI [8, 59]<br>(3 Eyes)   | 37% with 95% CI [15, 59]<br>(4 Eyes)  |  | 17% with 95% CI [2, 49]<br>(2 Eyes)   | 37% with 95% CI [17, 56]<br>(2 Eyes)  |

**Supplemental Table 3**

| Type of Glaucoma                                                                                           | N (%)<br>(n=76) | 5-Year<br>Cumulative<br>Probability<br>of Failure<br>(%) <sup>a</sup> | HR 95% CI                                                                                   | N (%)<br>(n=110) | 5-Year<br>Cumulative<br>Probability<br>of Failure<br>(%) <sup>b</sup> | HR; 95% CI                                                                                  | 5-Year<br>Cumulative<br>Probability of<br>Complication<br>(%) <sup>c</sup> | HR; 95% CI                                                                                      |
|------------------------------------------------------------------------------------------------------------|-----------------|-----------------------------------------------------------------------|---------------------------------------------------------------------------------------------|------------------|-----------------------------------------------------------------------|---------------------------------------------------------------------------------------------|----------------------------------------------------------------------------|-------------------------------------------------------------------------------------------------|
| <b>PCG</b><br>vs. JOAG<br>vs. Non-Acquired Ocular<br>vs. Non-Acquired Systemic<br>vs. Acquired<br>vs. GFCS | 17 (22%)        | 37%                                                                   | 0.46; 0.10-2.17<br>1.16; 0.47-2.84<br>0.33; 0.08-1.38<br>0.43; 0.14-1.33<br>0.40; 0.13-1.19 | 27 (25%)         | 43%                                                                   | 0.27; 0.08-0.96<br>0.82; 0.38-1.74<br>0.42; 0.14-1.29<br>0.35; 0.20-1.39<br>0.52; 0.21-1.25 | 6%                                                                         | 0.24; 0.00-16.81<br>2.89; 0.49-17.09<br>2.66; 0.12-59.57<br>0.19; 0.00-9.99<br>4.47; 0.77-25.86 |
| <b>JOAG</b><br>vs. Non-Acquired Ocular<br>vs. Non-Acquired Systemic<br>vs. Acquired<br>vs. GFCS            | 4 (5%)          | 0%                                                                    | 2.57; 0.60-11.13<br>0.82; 0.05-13.27<br>0.95; 0.10-9.43<br>1.29; 0.17-9.93                  | 7 (6%)           | 0%                                                                    | 3.01; 0.79-11.50<br>1.40; 0.14-13.99<br>1.68; 0.25-11.47<br>2.08; 0.38-11.31                | 0%                                                                         | 3.40; 0.24-48.90<br>6.52; 0.13-331.5<br>-----<br>4.02; 0.45-35.84                               |
| <b>Non-Acquired Ocular Disease</b><br>vs. Non-Acquired Systemic<br>vs. Acquired<br>vs. GFCS                | 21 (29%)        | 64%                                                                   | 0.38; 0.09-1.58<br>0.42; 0.14-1.26<br>0.53; 0.18-1.52                                       | 35 (32%)         | 45%                                                                   | 0.61; 0.17-2.17<br>0.70; 0.25-2.00<br>0.80; 0.31-2.03                                       | 18%                                                                        | 0.96; 0.11-8.31<br>0.25; 0.03-2.26<br>1.71; 0.41-7.20                                           |
| <b>Non-Acquired Systemic Disease</b><br>vs. Acquired<br>vs. GFCS                                           | 7 (9%)          | 14%                                                                   | 1.12; 0.12-10.48<br>1.83; 0.28-12.11                                                        | 9 (9%)           | 20%                                                                   | 1.15; 0.22-6.07<br>1.46; 0.33-6.40                                                          | 11%                                                                        | 0.08; 0.00-4.49<br>1.91; 0.29-12.45                                                             |
| <b>Acquired</b><br>vs. GFCS                                                                                | 12 (14%)        | 35%                                                                   | 1.27; 0.29-5.60                                                                             | 13 (11%)         | 40%                                                                   | 1.07; 0.30-3.76                                                                             | 0%                                                                         | 4.95; 0.65-37.60                                                                                |
| <b>GFCS</b>                                                                                                | 15 (20%)        | 35%                                                                   |                                                                                             | 19 (17%)         | 42%                                                                   |                                                                                             | 27%                                                                        |                                                                                                 |

<sup>a</sup> Comparison of probability of failure for all types of glaucoma for 1st Baerveldt surgery, p=0.41

<sup>b</sup> Comparison of probability of failure for all types of glaucoma for all Baerveldt surgeries, p=0.89

<sup>c</sup> Comparison of probability of complication for all types of glaucoma for all Baerveldt surgeries, p=0.37

**Supplemental Table 4**

| <b>Final Visual Acuity</b> |                        |
|----------------------------|------------------------|
| <b>20/20 to 20/40</b>      | 26 Eyes of 20 Patients |
| <b>20/50 to 20/150</b>     | 31 Eyes of 26 Patients |
| <b>20/200 or Worse</b>     | 24 Eyes of 21 Patients |
| <b>Fix and Follow</b>      | 5 Eyes of 4 Patients   |
| <b>Count Fingers</b>       | 3 Eyes of 3 Patients   |
| <b>Hand Motions</b>        | 4 Eyes of 3 Patients   |
| <b>Light Perception</b>    | 9 Eyes of 9 Patients   |
| <b>No Light Perception</b> | 4 Eyes of 4 Patients   |
